# Supplementary material
Source: MDPI journal article supplement (https://www.mdpi.com/2071-1050/16/5/1800)
Supplement: s1 [file s1]

# **Spatial distribution, ecological risk assessment, and source identification of metals in sediments of the Krka River estuary (Croatia)**

Nuša Cukrov<sup>1</sup>, Ana-Marija Cindrić<sup>1</sup>, Dario Omanović<sup>1</sup> and Neven Cukrov<sup>1\*</sup>

<sup>1</sup> Department for Marine and Environmental Research, Ruđer Bošković Institute, Bijenička cesta 54, 10000 Zagreb, Croatia. E-mail: [cukrov@irb.hr](mailto:cukrov@irb.hr)

\* Corresponding author. E-mail: [ncukrov@irb.hr](mailto:ncukrov@irb.hr)

**Table S1. Instrumental settings for HR ICP-MS**

| <b>Parameter</b>          | <b>Operating condition</b>       |
|---------------------------|----------------------------------|
| Instrument                | Thermo Finnigan Element 2        |
| RF power                  | 1200 W                           |
| Aux Ar flow               | 0.85-0.95 L/min (adjusted daily) |
| Sample Ar flow            | 0.90-1.10 L/min (adjusted daily) |
| Coolant Ar flow           | 15 L/min                         |
| Type of spray chamber     | Twister, 50 ml, Cyclonic         |
| Type of nebulizer         | SeaSpray, 0.4 mL/min             |
| Skimmer cone              | Nickel, “H” mode                 |
| Sample cone               | Nickel standard cone             |
| Typical oxide level       | <5% UO/U                         |
| Daily stability of signal | ±3%                              |
| Autosampler               | ESI SC-2 DX                      |
| Washing time              | 60 s                             |
| Take-up time              | 130 s                            |

**Table S2.** Measured element mass fractions (mean  $\pm$  standard deviation) and obtained recoveries of certified reference material (PACS-2, National Research Council of Canada).

| Element | Unit   | Certified value   | Measured value    | Recovery rate |
|---------|--------|-------------------|-------------------|---------------|
| Al      | g/100g | $6.62 \pm 0.32$   | $3.74 \pm 0.02$   | 56%           |
| Fe      |        | $4.09 \pm 0.06$   | $4.16 \pm 0.03$   | 102%          |
| Ti      |        | $0.443 \pm 0.032$ | $0.296 \pm 0.005$ | 67%           |
| P       |        | $0.096 \pm 0.004$ | $0.096 \pm 0.002$ | 100%          |
| Li      |        | $32.2 \pm 2$      | $31.4 \pm 0.24$   | 97%           |
| Cd      | mg/kg  | $2.11 \pm 0.15$   | $2.61 \pm 0.21$   | 124%          |
| Pb      |        | $183 \pm 8$       | $189 \pm 9$       | 103%          |
| Cr      |        | $90.7 \pm 4.6$    | $74.3 \pm 0.40$   | 82%           |
| Mn      |        | $440 \pm 19$      | $366 \pm 4$       | 83%           |
| Co      |        | $11.5 \pm 0.3$    | $10.3 \pm 0.10$   | 89%           |
| Ni      |        | $39.5 \pm 2.3$    | $46.4 \pm 4.44$   | 117%          |
| Cu      |        | $310 \pm 12$      | $369 \pm 5$       | 119%          |
| Zn      |        | $364 \pm 23$      | $390 \pm 4$       | 107%          |
| As      |        | $26.2 \pm 1.5$    | $28.2 \pm 0.47$   | 108%          |

**Table S3.** Chemical and granulometric composition of the 40 surface sediment samples (0-5 cm) (K1-K40) from the Krka River estuary. Element concentrations are expressed in  $\mu\text{g g}^{-1}$ . Granulometric fractions ( $< 63 \mu\text{m}$ ,  $> 63 \mu\text{m}$ ) are expressed in percentages. Mean grain size (Mz) is expressed in  $\mu\text{m}$ .

|                    | K1    | K2    | K3    | K4    | K5    | K6    | K7    | K8    | K9    | K10   | K11   | K12   | K13   | K14   | K15   | K16   | K17   | K18   | K19   | K20   |
|--------------------|-------|-------|-------|-------|-------|-------|-------|-------|-------|-------|-------|-------|-------|-------|-------|-------|-------|-------|-------|-------|
| Li                 | 27.6  | 25.9  | 32.4  | 27.3  | 41.0  | 51.4  | 60.7  | 38.0  | 58.5  | 64.0  | 25.8  | 63.2  | 37.2  | 69.0  | 56.3  | 41.4  | 46.1  | 60.5  | 71.3  | 50.9  |
| Cd                 | 0.468 | 0.471 | 0.530 | 0.434 | 0.444 | 0.426 | 0.433 | 0.532 | 0.426 | 0.369 | 0.203 | 0.383 | 0.255 | 0.382 | 0.383 | 0.280 | 0.441 | 0.384 | 0.452 | 0.960 |
| Pb                 | 18.0  | 18.0  | 23.6  | 21.7  | 29.8  | 35.0  | 38.5  | 19.9  | 30.4  | 47.2  | 24.5  | 52.1  | 38.4  | 82.3  | 78.3  | 45.8  | 64.3  | 83.3  | 117   | 665   |
| U                  | 2.47  | 2.40  | 2.19  | 2.19  | 2.05  | 2.09  | 2.23  | 2.66  | 2.55  | 1.67  | 1.83  | 2.65  | 1.94  | 2.22  | 2.42  | 2.62  | 3.50  | 2.45  | 2.49  | 3.69  |
| Al                 | 21666 | 21025 | 27130 | 18939 | 27948 | 33003 | 40700 | 36247 | 49234 | 43109 | 16948 | 41421 | 25733 | 49204 | 50933 | 33211 | 38883 | 44543 | 52861 | 38615 |
| Ti                 | 806   | 708   | 1002  | 696   | 856   | 1058  | 1207  | 1282  | 1814  | 1263  | 525   | 1352  | 872   | 1610  | 1911  | 1340  | 1555  | 1499  | 1733  | 1322  |
| Cr                 | 43.0  | 43.7  | 56.9  | 38.3  | 49.7  | 56.5  | 69.2  | 72.8  | 92.5  | 72.6  | 30.1  | 69.0  | 44.7  | 83.8  | 94.8  | 59.6  | 70.4  | 77.2  | 91.6  | 88.1  |
| Mn                 | 128   | 147   | 195   | 184   | 336   | 329   | 478   | 166   | 467   | 752   | 501   | 686   | 584   | 1014  | 329   | 261   | 454   | 1130  | 1689  | 32038 |
| Fe                 | 11211 | 11239 | 14938 | 10016 | 15090 | 17185 | 21074 | 21080 | 27382 | 22569 | 10074 | 21613 | 14080 | 26533 | 30140 | 19620 | 25300 | 24037 | 28405 | 27603 |
| Co                 | 3.51  | 3.56  | 5.03  | 3.62  | 4.91  | 5.28  | 7.21  | 6.01  | 8.70  | 7.56  | 3.53  | 7.67  | 5.42  | 9.65  | 9.04  | 6.71  | 8.26  | 8.90  | 11.0  | 16.1  |
| Ni                 | 25.4  | 26.4  | 35.5  | 22.2  | 30.3  | 34.0  | 46.3  | 44.1  | 57.0  | 47.5  | 19.5  | 45.4  | 30.2  | 57.0  | 58.3  | 37.5  | 44.8  | 52.0  | 63.4  | 63.2  |
| Cu                 | 16.6  | 20.6  | 30.8  | 12.0  | 15.8  | 15.1  | 17.3  | 27.2  | 24.0  | 20.3  | 9.27  | 20.6  | 14.6  | 30.6  | 88.3  | 24.5  | 73.0  | 30.1  | 39.8  | 89.8  |
| Zn                 | 76.0  | 70.2  | 99.7  | 66.0  | 86.6  | 82.0  | 96.8  | 70.0  | 101   | 108   | 52.0  | 106   | 74.9  | 151   | 133   | 75.8  | 125   | 146   | 191   | 495   |
| As                 | 5.43  | 6.26  | 7.72  | 7.49  | 7.73  | 8.49  | 9.93  | 9.16  | 13.6  | 10.0  | 6.87  | 11.5  | 7.51  | 10.2  | 18.0  | 12.0  | 16.9  | 10.6  | 11.8  | 19.9  |
| C                  | 10.1  | 9.65  | 8.76  | 10.2  | 9.27  | 8.79  | 7.76  | 8.66  | 7.09  | 7.55  | 9.65  | 7.95  | 8.95  | 7.27  | 6.46  | 7.72  | 8.85  | 7.94  | 7.28  | 9.88  |
| P                  | 0.0   | 0.04  | 0.05  | 0.0   | 0.04  | 0.04  | 0.05  | 0.06  | 0.06  | 0.06  | 0.05  | 0.06  | 0.05  | 0.08  | 0.08  | 0.05  | 0.08  | 0.08  | 0.09  | 0.16  |
| $< 63 \mu\text{m}$ | 70.6  | 70.2  | 78.4  | 73.5  | 76.3  | 77.4  | 69.9  | 57.0  | 65.7  | 80.1  | 52.0  | 65.7  | 56.2  | 70.5  | 83.7  | 68.2  | 58.9  | 70.5  | 73.2  | 68.8  |
| $> 63 \mu\text{m}$ | 29.4  | 29.8  | 21.6  | 26.5  | 23.6  | 22.5  | 30.1  | 42.9  | 34.3  | 19.9  | 48    | 34.2  | 43.8  | 29.4  | 16.3  | 31.9  | 41.2  | 29.4  | 26.8  | 31.3  |
| Mz                 | 53.9  | 83.6  | 44.3  | 70.5  | 41.9  | 41.2  | 56.0  | 80.2  | 120   | 45.4  | 96.9  | 75.5  | 93.3  | 47.3  | 53.6  | 85.4  | 113   | 57.3  | 45.8  | 72.0  |

**Table S3.** (continued)

|                    | K21   | K22   | K23   | K24   | K25   | K26   | K27   | K28   | K29   | K30   | K31   | K32   | K33   | K34   | K35   | K36   | K37   | K38   | K39   | K40   |
|--------------------|-------|-------|-------|-------|-------|-------|-------|-------|-------|-------|-------|-------|-------|-------|-------|-------|-------|-------|-------|-------|
| Li                 | 53.1  | 52.4  | 49.8  | 11.4  | 22.6  | 15.6  | 12.1  | 25.6  | 32.8  | 36.4  | 42.0  | 50.3  | 44.5  | 42.5  | 15.9  | 28.3  | 45.1  | 47.6  | 52.9  | 43.2  |
| Cd                 | 0.473 | 0.458 | 0.542 | 0.582 | 0.141 | 0.159 | 0.112 | 0.321 | 0.241 | 0.739 | 0.953 | 0.906 | 2.70  | 1.36  | 3.84  | 11.2  | 1.32  | 0.648 | 0.574 | 0.413 |
| Pb                 | 123   | 108   | 132   | 93.2  | 21.5  | 19.0  | 21.1  | 45.0  | 57.1  | 130   | 152   | 231   | 144   | 159   | 78.5  | 192   | 165   | 149   | 117   | 85.4  |
| U                  | 2.40  | 2.23  | 3.31  | 5.01  | 2.81  | 2.25  | 2.43  | 3.18  | 2.68  | 3.44  | 4.00  | 4.30  | 5.61  | 3.98  | 8.22  | 25.02 | 3.12  | 2.97  | 2.99  | 2.31  |
| Al                 | 40501 | 39254 | 39000 | 8432  | 18257 | 9778  | 5453  | 17264 | 22999 | 28517 | 33175 | 35222 | 41191 | 38117 | 19992 | 32450 | 34064 | 35469 | 37143 | 30076 |
| Ti                 | 1295  | 1375  | 1364  | 434   | 856   | 397   | 174   | 603   | 799   | 905   | 1096  | 1276  | 1337  | 1272  | 470   | 875   | 1224  | 1329  | 1326  | 1059  |
| Cr                 | 80.5  | 79.7  | 82.6  | 31.3  | 45.0  | 26.3  | 20.7  | 46.0  | 51.9  | 64.2  | 75.5  | 80.6  | 90.2  | 88.6  | 49.1  | 129   | 85.5  | 80.5  | 83.0  | 65.5  |
| Mn                 | 3643  | 2161  | 1723  | 309   | 226   | 215   | 216   | 610   | 897   | 895   | 850   | 623   | 746   | 603   | 350   | 866   | 1027  | 1263  | 1365  | 1454  |
| Fe                 | 23977 | 23357 | 24050 | 6474  | 11075 | 8124  | 11865 | 14735 | 17624 | 18637 | 22141 | 25063 | 24642 | 26342 | 12438 | 19025 | 22542 | 22752 | 23241 | 18751 |
| Co                 | 10.2  | 9.51  | 10.2  | 2.52  | 3.90  | 3.23  | 4.03  | 6.28  | 7.23  | 7.39  | 8.26  | 7.64  | 8.03  | 8.41  | 3.68  | 6.18  | 8.33  | 9.11  | 9.78  | 8.11  |
| Ni                 | 55.9  | 52.7  | 55.2  | 16.1  | 29.7  | 16.5  | 11.3  | 27.6  | 36.4  | 38.9  | 41.7  | 43.9  | 51.8  | 58.2  | 20.0  | 38.2  | 49.9  | 51.8  | 55.1  | 44.5  |
| Cu                 | 46.3  | 44.0  | 62.0  | 133   | 12.4  | 8.17  | 5.25  | 19.3  | 25.9  | 54.2  | 65.7  | 90.9  | 76.7  | 92.5  | 32.7  | 112   | 92.0  | 74.0  | 55.8  | 36.0  |
| Zn                 | 198   | 187   | 243   | 474   | 40.7  | 37.6  | 47.8  | 98.2  | 123   | 241   | 300   | 341   | 497   | 389   | 280   | 1201  | 367   | 281   | 224   | 143   |
| As                 | 12.4  | 12.1  | 14.7  | 9.78  | 8.90  | 8.14  | 9.75  | 8.47  | 8.92  | 18.6  | 23.4  | 39.6  | 16.9  | 17.2  | 22.1  | 22.4  | 20.2  | 15.4  | 14.4  | 10.4  |
| C                  | 8.82  | 8.66  | 8.92  | 10.6  | 9.69  | 10.4  | 12.0  | 10.5  | 9.62  | 9.59  | 9.15  | 9.09  | 8.51  | 8.22  | 9.75  | 7.39  | 9.16  | 9.02  | 8.81  | 8.86  |
| P                  | 0.112 | 0.115 | 0.191 | 0.287 | 0.023 | 0.023 | 0.028 | 0.059 | 0.072 | 0.186 | 0.271 | 0.159 | 0.677 | 0.280 | 1.35  | 4.28  | 0.235 | 0.151 | 0.130 | 0.099 |
| < 63 $\mu\text{m}$ | 62.2  | 79.3  | 66.4  | 51.5  | 56.5  |       |       | 30.7  | 58.2  | 57.0  | 58.2  | 56.3  | 71.7  | 81.6  | 54.7  | 51.3  | 52.9  | 66.9  | 68.0  | 74.7  |
| > 63 $\mu\text{m}$ | 37.8  | 20.7  | 33.6  | 48.5  | 43.4  |       |       | 69.3  | 41.8  | 43    | 41.9  | 43.7  | 28.3  | 18.4  | 45.4  | 48.8  | 47.1  | 33.1  | 32    | 25.3  |
| Mz                 | 59.7  | 41.3  | 53.6  | 130   | 91.0  |       |       | 157   | 94.4  | 121   | 78.5  | 101   | 48.9  | 45.5  | 95.3  | 102   | 71.1  | 62.8  | 99.4  | 82.2  |

**Table S4.** Metal concentrations in the slag (<sup>a</sup>this study, <sup>b</sup>[48]) and soil (<sup>b</sup>[48]) from the former TEF factory. Values are expressed in  $\mu\text{g g}^{-1}$ , except for Mn, Al and Fe which are in %

| Element | Slag <sup>a</sup> | Slag <sup>b</sup> | Soil <sup>b</sup> |
|---------|-------------------|-------------------|-------------------|
| Al      | 6.62              | -                 | -                 |
| Fe      | 1.02              | 63.6              | 4.4               |
| Mn      | 12.4              | 1.0               | 13.0              |
| Co      | 45.6              | -                 | -                 |
| Ni      | 37.8              | -                 | -                 |
| Cu      | 63.2              | 410               | 172               |
| Zn      | 70.3              | 1 480             | 612               |
| As      | 22.9              | -                 | -                 |
| Cr      | 30.9              | 700               | 152               |
| Pb      | 16.8              | 250               | 198               |
| Cd      | 0.52              | -                 | -                 |

**Table S5.** Ranges of metal concentrations in the Krka River estuary and in the costal and estuarine environments in Croatia and other European countries. Values are expressed as  $\mu\text{g g}^{-1}$ .

| Location                  | Mn         | Co        | Ni        | Cu        | Zn         | As        | Cr        | Pb        | Cd        | Reference  |
|---------------------------|------------|-----------|-----------|-----------|------------|-----------|-----------|-----------|-----------|------------|
| Neretva River delta       | 107-1 318  | 0.36-17.9 | 3.63-87.9 | 5.14-108  | 10.6-162   | -         | -         | 4.36-48.8 | 0.10-2.01 | [35]       |
| Bakar Bay                 | -          | 11.5-14.3 | 56.3-80.7 | 30.7-89.3 | 85.5-156   | 10.3-19   | 52.8-69.8 | 41.2-71.5 | 0.17-0.4  | [17]       |
| Rijeka Harbour            | -          | 9.00-16.4 | 54.8-143  | 30.6-429  | 69.8-1 260 | 9.50-37.7 | 42.7-117  | 23.6-637  | 0.14-4.66 | [18]       |
| Makirina Bay              | 200-300    | 7.05-10.8 | 26.5-37.9 | 27.6-34.1 | 47.7-50.6  | 14.5-17.4 | 82.1-120  | 23.7-27.4 | 0.25-0.33 | [36]       |
| Toulon Bay                | -          | -         | 8.8-37.6  | 5.8-846   | 24.3-1 340 | 6.7-61    | 8.5-121   | 14.9-469  | 0.05-2.90 | [65]       |
| Loire estuary             | -          | -         | 0.88-68.6 | <LOD-84.0 | 3.87-349   | 0.53-47.7 | 2.02-315  | 1.49-104  | 0.01-3.33 | [14]       |
| Gulf of Trieste           | -          | -         | 88.0-97.0 | 28.0-35.0 | 155-175    | 10.9-15.7 | 150-171   | 64.0-76.0 | 0.16-0.23 | [1]        |
| Tiber estuary             | -          | -         | 6.22-494  | 16.0-528  | 6.18-413   | 2.65-45.3 | 8.52-190  | 3.07-187  | 0.08-2.22 | [45]       |
| Nerbioi-Ibaizabal estuary | 66-935     | 0.3-16    | 3.4-120   | 15-571    | 41-1 260   | 0.6-220   | 5.0-134   | 21-445    | 0.01-17   | [25]       |
| Krka River estuary        | 128-32 038 | 2.52-16.1 | 11.3-63.4 | 5.25-63.4 | 37.6-1 201 | 5.43-39.6 | 20.7-129  | 18.0-665  | 0.11-11.2 | This study |

**Table S6.** Percentage of variance, cumulative variance, loadings and component scores (after Varimax rotation) of the principal components obtained in the analysis.

|                  |    | PC1    | PC2    | PC3    |
|------------------|----|--------|--------|--------|
| Variability (%)  |    | 41.5   | 29.2   | 18.8   |
| Cumulative %     |    | 41.5   | 70.7   | 89.5   |
| Factor loadings  | Li | 0.935  | -0.175 | 0.083  |
|                  | Cd | -0.021 | 0.976  | -0.023 |
|                  | Pb | 0.175  | 0.243  | 0.942  |
|                  | U  | -0.068 | 0.981  | -0.001 |
|                  | Al | 0.987  | 0.032  | 0.083  |
|                  | Ti | 0.968  | -0.064 | 0.105  |
|                  | Cr | 0.812  | 0.513  | 0.228  |
|                  | Mn | 0.045  | -0.050 | 0.893  |
|                  | Fe | 0.922  | 0.061  | 0.311  |
|                  | Co | 0.735  | -0.031 | 0.624  |
|                  | Ni | 0.921  | 0.016  | 0.333  |
|                  | Cu | 0.208  | 0.576  | 0.507  |
|                  | Zn | 0.072  | 0.910  | 0.347  |
|                  | As | 0.263  | 0.494  | 0.454  |
|                  | C  | -0.893 | -0.201 | 0.250  |
|                  | P  | -0.047 | 0.973  | -0.054 |
|                  | Li | 0.935  | -0.175 | 0.083  |
| Component scores | Cd | -0.021 | 0.976  | -0.023 |
|                  | Pb | 0.175  | 0.243  | 0.942  |
|                  | U  | -0.068 | 0.981  | -0.001 |
|                  | Al | 0.987  | 0.032  | 0.083  |
|                  | Ti | 0.968  | -0.064 | 0.105  |
|                  | Cr | 0.812  | 0.513  | 0.228  |
|                  | Mn | 0.045  | -0.050 | 0.893  |
|                  | Fe | 0.922  | 0.061  | 0.311  |
|                  | Co | 0.735  | -0.031 | 0.624  |
|                  | Ni | 0.921  | 0.016  | 0.333  |
|                  | Cu | 0.208  | 0.576  | 0.507  |
|                  | Zn | 0.072  | 0.910  | 0.347  |
|                  | As | 0.263  | 0.494  | 0.454  |
|                  | C  | -0.893 | -0.201 | 0.250  |
|                  | P  | -0.047 | 0.973  | -0.054 |

**Table S7.** Pearson correlation matrix for parameters measured in the surface sediment from the Krka River estuary

|         | Li           | Cd          | Pb          | U           | Al           | Ti           | Cr           | Mn          | Fe           | Co           | Ni           | Cu          | Zn          | As    | C            | P     | <63<br>µm |
|---------|--------------|-------------|-------------|-------------|--------------|--------------|--------------|-------------|--------------|--------------|--------------|-------------|-------------|-------|--------------|-------|-----------|
| Li      | 1.00         |             |             |             |              |              |              |             |              |              |              |             |             |       |              |       |           |
| Cd      | -0.18        | 1.00        |             |             |              |              |              |             |              |              |              |             |             |       |              |       |           |
| Pb      | 0.22         | 0.23        | 1.00        |             |              |              |              |             |              |              |              |             |             |       |              |       |           |
| U       | -0.22        | <b>0.98</b> | 0.24        | 1.00        |              |              |              |             |              |              |              |             |             |       |              |       |           |
| Al      | <b>0.94</b>  | 0.02        | 0.27        | -0.03       | 1.00         |              |              |             |              |              |              |             |             |       |              |       |           |
| Ti      | <b>0.89</b>  | -0.10       | 0.24        | -0.13       | <b>0.96</b>  | 1.00         |              |             |              |              |              |             |             |       |              |       |           |
| Cr      | <b>0.67</b>  | <b>0.48</b> | <b>0.48</b> | <b>0.45</b> | <b>0.83</b>  | <b>0.78</b>  | 1.00         |             |              |              |              |             |             |       |              |       |           |
| Mn      | 0.15         | 0.01        | <b>0.88</b> | 0.01        | 0.15         | 0.14         | 0.21         | 1.00        |              |              |              |             |             |       |              |       |           |
| Fe      | <b>0.85</b>  | 0.03        | <b>0.45</b> | -0.01       | <b>0.93</b>  | <b>0.92</b>  | <b>0.85</b>  | 0.27        | 1.00         |              |              |             |             |       |              |       |           |
| Co      | <b>0.75</b>  | -0.04       | <b>0.70</b> | -0.06       | <b>0.77</b>  | <b>0.75</b>  | <b>0.73</b>  | <b>0.61</b> | <b>0.88</b>  | 1.00         |              |             |             |       |              |       |           |
| Ni      | <b>0.87</b>  | -0.01       | <b>0.47</b> | -0.05       | <b>0.93</b>  | <b>0.92</b>  | <b>0.85</b>  | 0.33        | <b>0.95</b>  | <b>0.91</b>  | 1.00         |             |             |       |              |       |           |
| Cu      | 0.07         | <b>0.43</b> | <b>0.60</b> | <b>0.47</b> | 0.24         | 0.27         | <b>0.57</b>  | 0.25        | 0.39         | 0.38         | 0.38         | 1.00        |             |       |              |       |           |
| Zn      | -0.05        | <b>0.86</b> | <b>0.56</b> | <b>0.88</b> | 0.13         | 0.04         | <b>0.61</b>  | 0.25        | 0.21         | 0.24         | 0.21         | <b>0.77</b> | 1.00        |       |              |       |           |
| As      | 0.18         | 0.39        | <b>0.56</b> | 0.40        | 0.30         | 0.28         | <b>0.55</b>  | 0.19        | <b>0.48</b>  | 0.39         | 0.34         | <b>0.66</b> | <b>0.56</b> | 1.00  |              |       |           |
| C       | <b>-0.78</b> | -0.19       | 0.00        | -0.15       | <b>-0.87</b> | <b>-0.83</b> | <b>-0.75</b> | 0.11        | <b>-0.72</b> | <b>-0.47</b> | <b>-0.72</b> | -0.16       | -0.16       | -0.17 | 1.00         |       |           |
| P       | -0.20        | <b>0.99</b> | 0.20        | <b>0.99</b> | -0.01        | -0.13        | <b>0.45</b>  | -0.02       | -0.01        | -0.06        | -0.05        | <b>0.41</b> | <b>0.85</b> | 0.36  | -0.18        | 1.00  |           |
| < 63 µm | <b>0.50</b>  | -0.23       | -0.02       | -0.31       | <b>0.49</b>  | <b>0.48</b>  | 0.22         | 0.06        | 0.35         | 0.24         | <b>0.42</b>  | -0.11       | -0.21       | -0.18 | <b>-0.47</b> | -0.25 | 1.00      |

**p=0.01, r critical = 0.40264; p=0.001, r critical = 0.50070**
